# Fitting the Balding-Nichols model to forensic databases

Rori V. Rohlf<sup>a</sup>, Vitor R. C. Aguiar<sup>c</sup>, Kirk E. Lohmueller<sup>b</sup>, Amanda M. Castro<sup>c</sup>, Alessandro C. S. Ferreira<sup>c</sup>, Vanessa C. O. Almeida<sup>c</sup>, Iuri D. Louro<sup>c</sup>, Rasmus Nielsen<sup>a</sup>

<sup>a</sup>*University of California, Berkeley*

*Department of Integrative Biology*

<sup>b</sup>*University of California, Los Angeles*

*Department of Ecology and Evolutionary Biology*

<sup>c</sup>*Universidade Federal do Espírito Santo*

*Departamento de Ciências Biológicas*

---

## Abstract

Large forensic databases provide an opportunity to compare observed empirical rates of genotype matching with those expected under forensic genetic models. A number of researchers have taken advantage of this opportunity to validate some forensic genetic approaches, particularly to ensure that estimated rates of genotype matching between unrelated individuals are indeed slight overestimates of those observed. However, these studies have also revealed systematic error trends in genotype probability estimates. In this analysis, we investigate these error trends and show how the specific implementation of the Balding-Nichols model must be considered when applied to database-wide matching. Specifically, we show that in addition to accounting for increased allelic matching between individuals with recent shared ancestry, studies must account for relatively decreased allelic matching between individuals with more ancient shared ancestry.

*Keywords:* Balding-Nichols model, population genetics, partial match probability, DNA database

---

## 1. Introduction

Forensic databases, rapidly increasing in size, invite powerful analyses of rates of coincidental genotype matching [1, 2, 3]. Such analyses have validated some basic assumptions in forensic genetics, particularly the reasonable over-estimation of genotype frequencies with existing methods. However, these studies also illustrate how database population genetic diversity differs from what is expected under the basic model of forensic genetics: the Balding-Nichols (BN) model.

The BN model simply and elegantly provides a framework for estimating probabilities of observed genotypes, taking into account population structure and variance in allele frequency estimates [4, 5]. The BN model can be interpreted as describing an ancestral population which has split into a number of internally randomly mating sub-populations which evolve independently over some time, resulting in a present-day total population made up of a number of cryptic sub-population groups. The sampling probabilities estimated under the BN model then incorporate the deviations from Hardy-Weinberg equilibrium expected due to population divergence.

The amount of excess allele-sharing in a sub-population group beyond what is expected based on the total population allele frequencies can be quantified in the BN model by the parameter  $\theta$ .  $\theta$  can be thought of as the probability that two alleles in a sub-population are identical by descent (IBD) due to within sub-population shared ancestry. In a coalescent framework under simplifying assumptions, it represents the probability that two alleles sampled from within a sub-population coalesce before either mutates or

25 migrates out of the sub-population [4].

26 In the BN model used in forensic applications, the probability of observing  
 27 a particular genotype conditioning on having observed the same genotype is  
 28 estimated using the  $\theta$  correction to account for coincidental allelic sharing be-  
 29 tween two individuals due to excess shared ancestry within a sub-population.  
 30 In most forensic calculations, there is an implicit assumption that the individ-  
 31 uals in question are from the same sub-population [4]. Balding and Nichols  
 32 convincingly argue that this assumption is appropriate, saying “the ‘same  
 33 sub-population’ assumption is conservative, since the suspect’s profile will  
 34 tend to be more common in his/her sub-population than in other groups”  
 35 [4]. A number of studies have shown the importance and appropriateness of  
 36 this assumption and the corresponding  $\theta$  correction in genetic identification  
 37 calculations [5, 6, 7, 8, 9, 10, 11, 12].

38 In database applications, typically all pairs of genotypes in a database  
 39 will be compared to each other and their degree of matching assessed. Previ-  
 40 ous applications of the standard BN model to forensic databases [1, 2] have  
 41 shown that the often-used  $\theta$  correction of 0.01 usually adequately corrects  
 42 for coincidental allele-sharing, raising estimated probabilities of matching  
 43 genotypes above their observed levels, and therefore reducing false positive  
 44 rates below their expectation (in statistical terms, making the test ‘con-  
 45 servative’). Yet, these analyses show an excess of non-similarity between  
 46 observed pairs of individuals, as compared to the expectation [1, 2]. As we  
 47 will show, this is likely due to the fact that the standard formulation of the  
 48 BN model does not take decreased allele sharing between individuals from  
 49 different sub-populations into account. When applying the BN model to de-

50 scribe the amount of genotypic matching observed in a database, it is not  
51 clear that the ‘same sub-population’ assumption is appropriate.

52 In this manuscript, we investigate how empirical genotype matching ob-  
53 servations can be explained by reconsidering the implementation of the BN  
54 model. We show that by accounting for the case of two individuals deriv-  
55 ing from different population groups, we significantly improve the ability to  
56 describe empirical matching rates in a database.

## 57 2. Methods

### 58 2.1. Allele sharing matrix

59 To quantify the degree of multi-locus genotype matching within a data set,  
60 consider the matrix  $M$  where each entry  $M_{m,p}$  is the number of profile pairs  
61 with  $m$  markers matching at both alleles and  $p$  markers matching at one allele  
62 [1, 2]. Tvedebrink *et al.* [2] described a recursive algorithm to compute the  
63 probability  $\pi_{m,p}$  that two multi-locus genotypes completely match at  $m$  loci  
64 and partially match at  $p$  loci, constructing a probability matrix  $\pi$  analogous  
65 to  $M$ . This method uses the single-locus probabilities of individuals matching  
66 two, one, and zero alleles as  $P_{1,0}$ ,  $P_{0,1}$ , and  $P_{0,0}$ , respectively, following in the  
67 notation of Tvedebrink *et al.* [2]. Note the parallel notation to counts of  
68 matching and partially matching markers in  $M_{m,p}$ . Weir [1] described how  
69 to compute  $P_{1,0}$ ,  $P_{0,1}$ , and  $P_{0,0}$  at a locus by summing over the appropriate  
70 two-individual single locus genotype probabilities [1].

## 71 2.2. Single locus allelic sharing probabilities

### 72 2.2.1. Individuals from the same sub-population group

73 Under the typical implementation of the BN model, where all individuals  
74 are assumed to be in the same sub-population group, the two-individual  
75 genotype probabilities are

$$\begin{aligned}
 P(A_{1,1}A_{1,1}, A_{1,1}A_{1,1}) &= p_1(\theta + (1 - \theta)p_1)\left(\frac{2\theta + (1 - \theta)p_1}{1 + \theta}\right)\left(\frac{3\theta + (1 - \theta)p_1}{1 + 2\theta}\right) \\
 P(A_{1,1}A_{1,1}, A_{1,1}A_{1,2}) &= \frac{4p_1p_2(1 - \theta)(\theta + (1 - \theta)p_1)(2\theta + (1 - \theta)p_1)}{(\theta + 1)(2\theta + 1)} \\
 P(A_{1,1}A_{1,2}, A_{1,1}A_{1,2}) &= \frac{4p_1p_2(1 - \theta)(\theta + (1 - \theta)p_1)(\theta + (1 - \theta)p_2)}{(\theta + 1)(2\theta + 1)} \\
 P(A_{1,1}A_{1,2}, A_{1,1}A_{1,3}) &= \frac{8p_1p_2p_3(1 - \theta)^2(\theta + (1 - \theta)p_1)}{(\theta + 1)(2\theta + 1)} \\
 P(A_{1,1}A_{1,1}, A_{1,2}A_{1,2}) &= \frac{2p_1p_2(1 - \theta)(\theta + (1 - \theta)p_1)(\theta + (1 - \theta)p_2)}{(\theta + 1)(2\theta + 1)} \\
 P(A_{1,1}A_{1,1}, A_{1,2}A_{1,3}) &= \frac{4p_1p_2p_3(1 - \theta)^2(\theta + (1 - \theta)p_1)}{(\theta + 1)(2\theta + 1)} \\
 P(A_{1,1}A_{1,2}, A_{1,3}A_{1,4}) &= \frac{24p_1p_2p_3p_4(1 - \theta)^3}{(\theta + 1)(2\theta + 1)} \tag{1}
 \end{aligned}$$

76 where  $A_{1,i}$  is an allele  $i$  drawn from the single sub-population 1, so, for  
77 example  $P(A_{1,i}A_{1,i}, A_{1,i}A_{1,j})$  is the probability observing a homozygote and  
78 heterozygote sharing one allele, and  $p_i$  is the frequency of allele  $i$ .

### 79 2.2.2. Individuals from same or different sub-population groups

80 Under the BN model, if two individuals are not in the same population  
81 group, the probability that their alleles coalesce more recently than a muta-  
82 tion or migration event is zero. In other words, there is no increased chance  
83 of allele-sharing due to shared ancestry for individuals in different population

84 groups. In that case, the probability of observing their genotypes is computed  
85 as a function of the observed allele frequencies without the  $\theta$  correction.

86 We can allow individuals to be from different sub-populations by introduc-  
87 ing a parameter  $d$ , which describes the probability that a pair of individuals  
88 are from different sub-population groups. This way, we fully describe the  
89 BN model with some individuals from the same sub-population group and  
90 some from differing groups. Under a model with population differentiation,  
91 two-individual genotype probabilities are

$$\begin{aligned} P(A_{.,.}A_{.,.}, A_{.,.}A_{.,.}) &= (1 - d)P(A_{1,.}A_{1,.}, A_{1,.}A_{1,.}) \\ &\quad + dP(A_{1,.}A_{1,.}, A_{2,.}A_{2,.}) \end{aligned}$$

92 where subscript dots indicate any option such that  $A_{.,.}$  is any allele drawn  
93 from any sub-population and  $A_{1,.}$  is any allele drawn from sub-population 1.  
94 Genotype probabilities for individuals from the same population are the same  
95 as under the typical implementation of the BN model and for individuals from  
96 different sub-populations the genotype probabilities are

$$\begin{aligned} P(A_{1,1}A_{1,1}, A_{2,1}A_{2,1}) &= p_1^2(\theta + (1 - \theta)p_1)^2 \\ P(A_{1,1}A_{1,1}, A_{2,1}A_{2,2}) &= 4p_1^2p_2(1 - \theta)(\theta + (1 - \theta)p_1) \\ P(A_{1,1}A_{1,2}, A_{2,1}A_{2,2}) &= 4p_1^2p_2^2(1 - \theta)(1 - \theta) \\ P(A_{1,1}A_{1,2}, A_{2,1}A_{2,3}) &= 8p_1^2p_2p_3(1 - \theta)(1 - \theta) \\ P(A_{1,1}A_{1,1}, A_{2,2}A_{2,2}) &= 2p_1p_2(\theta + (1 - \theta)p_1)(\theta + (1 - \theta)p_2) \\ P(A_{1,1}A_{1,1}, A_{2,2}A_{2,3}) &= 4p_1p_2p_3(1 - \theta)(\theta + (1 - \theta)p_1) \\ P(A_{1,1}A_{1,2}, A_{2,3}A_{2,4}) &= 24p_1p_2p_3p_4(1 - \theta)(1 - \theta) \end{aligned}$$

### 97 2.2.3. *Chromosomes from same or different sub-populations*

98 In the previous formulation of joint genotype probabilities for two indi-  
 99 viduals, it is assumed that in each individual, both chromosomes derive from  
 100 the same sub-population. In post-colonial societies, where few individuals  
 101 can trace all their ancestry to their current location, this is not realistic. We  
 102 describe an alternative model allowing alleles within individuals to be drawn  
 103 from different, but correlated, sub-population groups. In this model there are  
 104  $k$  sub-populations of equal size and relation to each other. The correlation  
 105 of sub-population draws within individuals is described by the parameter  $a$ .  
 106 We can use this model to compute joint genotype probabilities, as shown in  
 107 Supplemental Materials.

### 108 2.3. *Likelihood framework*

109 With match probabilities specified by the aforementioned models, we can  
 110 calculate the expectation  $\pi$  of the match matrix  $M$  under varying assump-  
 111 tions regarding allele frequencies, and parameters of the models:  $\theta$  for the  
 112 typical implementation of the BN model without population differentiation,  
 113  $\theta$  and  $d$  for the model with population differentiation, and  $\theta$ ,  $a$ , and  $k$  for the  
 114 model allowing admixture between sub-populations (Table 1). By taking the  
 115 entries  $\pi$  as categorical probabilities in a multinomial distribution, we can  
 116 compute the sampling probability of an observed instance of  $M$ , an approach  
 117 used effectively in other population genetic applications [13].

118 Using the sampling probability of  $M$  as a likelihood function, we can es-  
 119 timate parameters of the model using maximum likelihood. Since the mod-  
 120 els described here are nested and fulfill standard regularity conditions, the  
 121 asymptotic distributions of likelihood ratio test statistics (LRTs) are known

to be chi square. Specifically, if we take the null hypothesis to be the typical implementation of the BN model with a fixed value of  $\theta$  (say  $H_0 : \theta = 0.01$ ), and the alternative to be the typical BN model implementation where  $\theta$  varies ( $H_a : \theta \neq 0.01$ ), the LRT is distributed as a chi square with one degree of freedom ( $LRT \chi_1^2$ ). Similarly, to compare the typical implementation of the BN model with our implementation with population differentiation, we specify  $H_0 : \theta \neq 0.01, d = 0$  and  $H_a : \theta \neq 0.01, d \neq 0$ , in which case the  $LRT \chi_0^2 + \chi_1^2$ . The model allowing chromosomes within individuals from different sub-populations reduces to the model with population differentiation under complete allelic correlation ( $a = 1$ ). In this case,  $d$  is equivalent to  $(k - 1)/k$ . This enables tests where  $LRT \chi_0^2 + \chi_1^2$  between the chromosomal model and the model with population differentiation

Additionally, we can obtain parameter estimates of  $\hat{\theta}$ ,  $\hat{d}$ ,  $\hat{a}$ ,  $\hat{k}$ , and  $\hat{c}$ . While we do not advocate interpreting these estimates too strongly, as the underlying population models are very simple, we can compare them as a reference.

## 2.4. Database

We consider genotype data from 99,275 Brazilian individuals undergoing paternity testing during 2011-2013 in the Hermes Pardini Laboratory, Vespasiano, MG, Brazil. The individuals genotyped reside in all 26 Brazilian States and the Federal District (Brasilia). The genotypes were obtained using a combination of two Life Technologies kits and ABI 3730 Genetic analyzers (Life Technologies, CA, USA) for a total of 20 loci (the original 13 CODIS core loci and additionally D10S1248, D22S1045, D1S1656, D12S391, D2S441, D2S1338, D19S433, PentaD, and PentaE) [14].



147 While there are no known relatives in this dataset, unknown relatives, or  
 148 multiple entries of the same individual are expected. As such, individuals  
 149 with 17-20 loci matching and the same birth dates (when available) were  
 150 removed as likely multiple entries or identical twins with some genotyping or  
 151 clerical errors. When dates were not available or inconsistent apparently due  
 152 to a typo, names were manually checked by the lab personnel and the most  
 153 complete profile was kept, resulting in a data set with 96,400 individuals [14].

154 Since our analysis requires genotypes across the same number of loci for  
 155 all individuals, we discarded all individuals with any missing data. In the  
 156 remaining data set, extremely rare alleles observed exactly one time may  
 157 be, in fact, genotyping errors. Profiles with these rare alleles were similarly  
 158 eliminated. The final dataset considered in this analysis contained 90,852  
 159 individuals.

### 160 **3. Results**

#### 161 *3.1. Observed database matching*

162 We counted the number of zero, one, and two allele matches for each  
 163 locus for each pair of individuals in the dataset to create the observed matrix  
 164  $M_{obs}$ , as shown in Supplemental Table 1. For example, in our dataset, out  
 165 of  $\binom{90852}{2} = 4,126,997,526$  pairs of genotypes, 295,948 pairs have exactly  
 166 one loci matching at both alleles, two loci matching at one allele (partially  
 167 matching), and 17 markers matching at neither allele (Supplemental Table  
 168 1).

### 169 3.2. Comparing data likelihood under different models

170 Previous investigators have used the conventional implementation of the  
 171 BN model (without population differentiation) with  $\theta$  fixed at 0.01 to describe  
 172 matching in databases [1, 2]. Under this model, setting  $\theta = 0.01$ , we calcu-  
 173 lated the log likelihood of the observed match matrix as  $-47,246,554,388$   
 174 (Table 1). We can graphically compare our observed and expected results in  
 175 a dropping ball diagram [11, 15, 2] (Figure 1), or in a heatmap of the resid-  
 176 uals (Figure 2a). The heatmaps in this manuscript show a color gradient  
 177 along the log of the divergence of the observed and expected as  $\log \frac{(obs-exp)^2}{exp}$ .  
 178 Through these visualizations, we see that as in previous analyses [1, 2], under  
 179 the typical BN model implementation with  $\theta$  set at 0.01, there is an excess  
 180 of observed pairs of individuals who share few alleles, as compared to the  
 181 expectation.

182 Using the maximum likelihood framework and optimizing over  $\theta$ , we per-  
 183 formed a similar analysis (Table 1, Supplemental Table 2). This model where  
 184  $\theta$  may vary fits the observed data significantly better than with  $\theta$  fixed at 0.01  
 185 ( $LRT = 94,490,590,210$ ). However, we still observed an excess of individu-  
 186 als sharing few alleles (Figure 2b). Further, under the maximum likelihood  
 187 of this model,  $\theta$  is estimated near zero as  $\hat{\theta} = 4.6e - 10$ , indicating that the  
 188  $\theta$  correction as implemented here is insufficient to describe the data. This  
 189 makes sense since the  $\theta$  correction accounts for excess allelic sharing due to  
 190 common ancestry within a sub-population.

191 We allow individuals in different sub-populations to share comparatively  
 192 fewer alleles through common ancestry using the population differentiation  
 193 model, where two random individuals derive from different sub-population

194 groups with probability  $d$ . Again, we find the maximum likelihood value un-  
 195 der this model (Table 1, Supplemental Table 3). The model fits the observed  
 196 data significantly better ( $LRT = 2,444,098$ ) and corrects for the previous  
 197 excess of individuals sharing few alleles (Figure 2c). However, we still see  
 198 consistent differences between the observed and expected allelic matching.  
 199 Compared to the observed data, the population differentiation model pre-  
 200 dicts a more narrow range of allelic matching than what is observed.

201 In the population differentiation model, it is assumed that both alleles  
 202 within an individual derive from the same sub-population. This assumption  
 203 may not be valid in realistic cases of admixture, and can be relaxed using  
 204 the a model where chromosomes are considered separately with some corre-  
 205 lation. We fit such a model with  $k$  equally represented sub-populations and  
 206 intra-individual allelic correlation to the observed data. This model, allowing  
 207 chromosomes of different population origins within individuals, fits the data  
 208 significantly better than the model without admixture ( $LRT = 148835$ ) (Fig-  
 209 ure 2d). Still, we observe a wider range of allelic matching than is expected  
 210 under these models.

## 211 4. Discussion and Conclusions

212 We have shown how a multinomial distribution on the expected match  
 213 matrix can be used to calculate the sampling probability of an observed match  
 214 matrix. Further, we have shown how this probability can be maximized with  
 215 respect to some parameters to provide maximum likelihood estimates of these  
 216 parameters.

217 Using this procedure, we found that estimating the value of  $\theta$ , unsurpris-

ingly, fits the data significantly better than a uniform value of 0.01. Further, we found that estimate to be near zero. This initially surprising estimate is explained by considering that the common implementation of the BN model in forensic genetics accounts for excess allele sharing due to recent ancestry, but not relatively less allele sharing for individuals with more distant ancestry. Under this implementation, every pair of individuals has increased allelic sharing due to recent ancestry. Since many pairs of individuals do not share recent ancestry, the maximum likelihood estimate of  $\theta$  is driven to zero to explain the lack of consistent excess allele sharing.

We show and implement several parameterizations of the full BN model where individuals may or may not have excess allele sharing (equivalently, may or may not derive from the same population group). This full BN model fit the observed match matrix significantly better than the typical BN model implementation. Under the full BN model,  $\hat{\theta} = 0.008$ , which is closer to the typical value used in practice of  $\theta = 0.01$ .

Even under the full BN model implementation, we predict a more narrow range of locus-matching than observed. In the BN model, all sub-populations have equal excess allele sharing internally and are equally unrelated to each other. While this model provides a simple and reasonable over-estimation of coincidental genotype match rates, essential to forensic case work, it is clearly a simplification of complex human population structures, where some individuals are vastly more related than others. A more sophisticated model allowing varying degrees of allele sharing between individuals would likely better fit our observation of a broad range of allelic-matching. However, such a model would begin to accumulate parameters, making use in forensic

243 case work impractical compared to the adequate typical BN model imple-  
244 mentation.

245 Additionally, the full BN model does not explain a small observed excess  
246 of people matching at many loci. For example, there are three pairs of  
247 individuals who match both alleles at 13 loci and one allele at six loci, whereas  
248 under the full BN model,  $5.0e - 13$  are expected. There are several possible  
249 explanations for these individuals. They may be genetic relatives who share a  
250 large number of alleles IBD. They could share even more alleles than expected  
251 if allele frequencies are mis-specified because they derive from a population  
252 group divergent from the whole sample [16]. It is also possible that the same  
253 individual was entered a number of times, with genotyping or clerical errors  
254 resulting in differing alleles.

255 Other authors have considered the presence of genetic relatives within  
256 a database when calculating genotype match probabilities with additional  
257 parameters for the probabilities that a pair of individuals hold particular  
258 genetic relationships [1, 17, 2]. This way, the total probability of genotype  
259 matching takes into account the possibility of genetic relationships. However,  
260 since the loci are still treated independently, the small probability of a genetic  
261 relationship is factored in at each locus separately, rather than considering  
262 how genetic relatives share alleles across loci. As a result, unless there are  
263 extensive genetic relatives in a dataset, this does not dramatically affect the  
264 expected allelic matching.

265 We have shown how the correct full implementation of the BN model  
266 is crucial to understanding database-wide allelic matching. While this is  
267 essential for database applications, it does not affect forensic case work where

the typical BN model implementation is adequate to reasonably overestimate the probability of coincidental genotype matching.

## Acknowledgements

We are immensely grateful to the individuals whose DNA samples were used in this study, without which none of this work would be possible. This work was supported in part by National Institutes of Health grant ???, National Science Foundation award 1103767, and a CAPES-Brazil scholarship (Programa Demanda Social and PhD Student Exchange Program BEX 8425/11-6) ??MORE??. The funders had no role in study design, data collection and analysis, decision to publish, or preparation of the manuscript. This study was approved by the Ethics Committee of the Federal University of Espirito Santo (Brazil) Health Sciences Department (No. 448327).

- [1] B. Weir, Matching and partially-matching DNA profiles, *Journal of Forensic Science* 49 (2004) 1009–1014.
- [2] T. Tvedebrink, P. S. Eriksen, J. M. Curran, H. S. Mogensen, N. Morling, Analysis of matches and partial-matches in a danish str data set, *Forensic Science International: Genetics* 6 (2012) 387–392.
- [3] J. Curran, T. Tvedebrink, DNAtools: Tools for empirical testing of DNA match probabilities, R package.
- [4] D. Balding, R. Nichols, DNA profile match probability calculation: How to allow for population stratification, relatedness, database selection and single bands, *Forsensic Science International* 64 (1994) 125–140.

- 290 [5] D. J. Balding, R. A. Nichols, A method for quantifying differentiation  
291 between populations at multi-allelic loci and its implications for investi-  
292 gating identity and paternity, in: B. Weir (Ed.), Human Identification:  
293 The Use of DNA Markers, Vol. 4 of Contemporary Issues in Genetics  
294 and Evolution, Springer Netherlands, 1995, pp. 3–12.
- 295 [6] P. Gill, I. Evett, Population genetics of short tandem repeat (str) loci, in:  
296 B. Weir (Ed.), Human Identification: The Use of DNA Markers, Vol. 4 of  
297 Contemporary Issues in Genetics and Evolution, Springer Netherlands,  
298 1995, pp. 69–87.
- 299 [7] I. Evett, P. Gill, J. Scrannage, B. Weir, Establishing the robustness of  
300 short-tandem-repeat statistics for forensic applications, The American  
301 Journal of Human Genetics 58 (1996) 398–407.
- 302 [8] I. Evett, P. Gill, J. Lambert, N. Oldroyd, R. Frazier, S. Watson, S. Pan-  
303 chal, A. Connolly, C. Kimpton, Statistical analysis of data for three  
304 british ethnic groups from a new str multiplex, International Journal of  
305 Legal Medicine 110 (1) (1997) 5–9.
- 306 [9] D. Balding, R. Nichols, Significant genetic correlations among Cau-  
307 casians at forensic DNA loci, Human Heredity 78 (1997) 583–589.
- 308 [10] J. M. Curran, J. S. Buckleton, C. M. Triggs, What is the magnitude of  
309 the subpopulation effect?, Forensic Science International 135 (2003) 1 –  
310 8.
- 311 [11] J. M. Curran, S. J. Walsh, J. Buckleton, Empirical testing of estimated

- 312 {DNA} frequencies, Forensic Science International: Genetics 1 (2007)  
313 267 – 272.
- 314 [12] B. Weir, The rarity of DNA profiles, The Annals of Applied Statistics 1  
315 (2007) 358–370.
- 316 [13] A. M. Adams, R. R. Hudson, Maximum-likelihood estimation of de-  
317 mographic parameters using the frequency spectrum of unlinked single-  
318 nucleotide polymorphisms, Genetics 168 (2004) 1699–1712.
- 319 [14] V. R. Aguiar, A. M. de Castro, V. C. Almeida, F. S. Malta, A. C.  
320 Ferreira, I. D. Louro, New {CODIS} core loci allele frequencies for 96,400  
321 brazilian individuals, Forensic Science International: Genetics in press.
- 322 [15] J. Curran, Are dna profiles as rare as we think? or can we trust dna  
323 statistics?, Significance 7 (2010) 62–66.
- 324 [16] R. Rohlf, S. Fullerton, B. Weir, Familial identification: Population  
325 structure and relationship distinguishability, PLoS Genetics 8 (2012)  
326 e1002469.
- 327 [17] L. Mueller, Can simple population genetic models reconcile partial  
328 match frequencies observed in large forensic databases?, Journal of Ge-  
329 netics 87 (2008) 101–108.

## 330 5. Tables

## 331 6. Figure Legends



| model                                        | log likelihood | $\hat{\theta}$ | $\hat{d}$ | $\hat{a}$ | $\hat{k}$ |
|----------------------------------------------|----------------|----------------|-----------|-----------|-----------|
| typical implementation with $\theta = 0.01$  | -47246554388   | NA             | NA        | NA        | NA        |
| typical implementation with $\theta$ varying | -1259283       | $4.6e - 10$    | NA        | NA        | NA        |
| population differentiation implementation    | -37234         | $7.6e - 03$    | 0.966     | NA        | NA        |
| sub-population groups by chromosome          | -37182         | $7.9e - 03$    | NA        | 0.939     | 3538.5    |

Table 1: The maximum log likelihoods and parameter estimates are listed for each model considered. For models which do not incorporate particular parameters, those estimates are listed as NA.

Figure 1: This dropping ball plot shows the observed (dot) and expected (x) numbers of pairs of individuals sharing  $m$  matching loci and  $p$  partially matching loci where  $m/p$  is indicated on the x-axis.

Figure 2: These heatmaps show the difference between the observed match matrix and that expected under, (a) the typical implementation of the BN model with  $\theta = 0.01$ , (b) the typical implementation of the BN model where  $\theta$  varies, (c) the full implementation of the BN model, and (d) the full implementation of the BN model allowing for admixture. Purple indicates a lack of observed pairs of individuals and green indicates an excess of observed pairs of individuals.

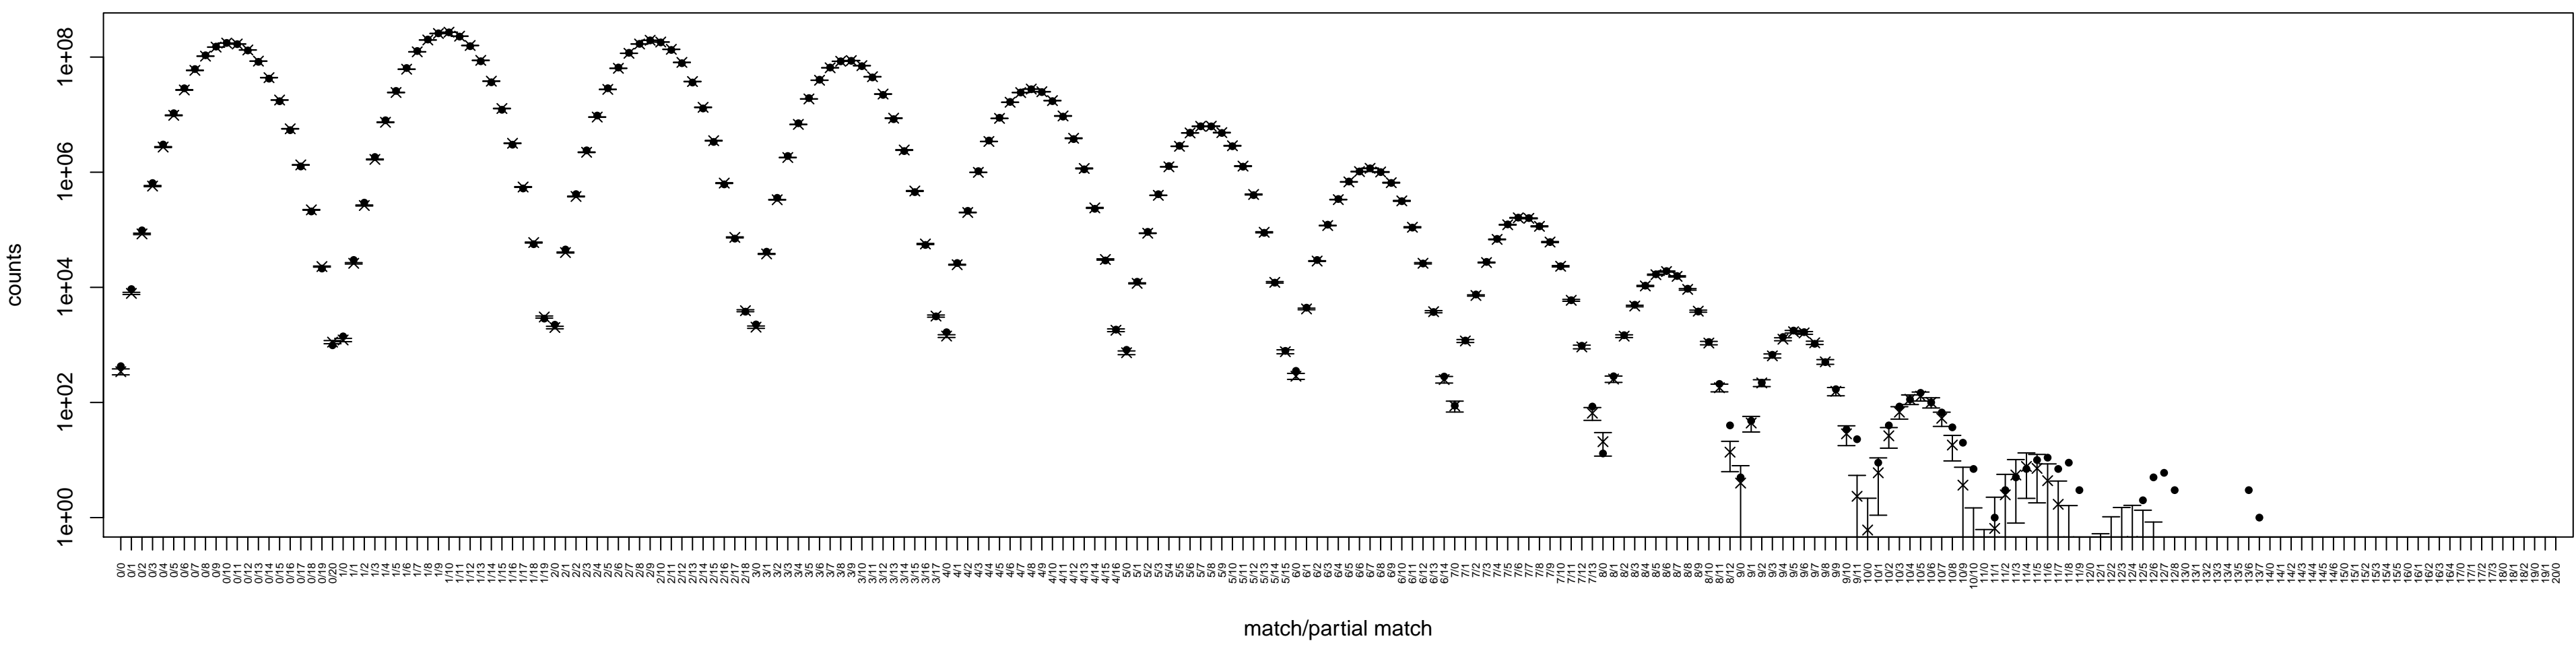

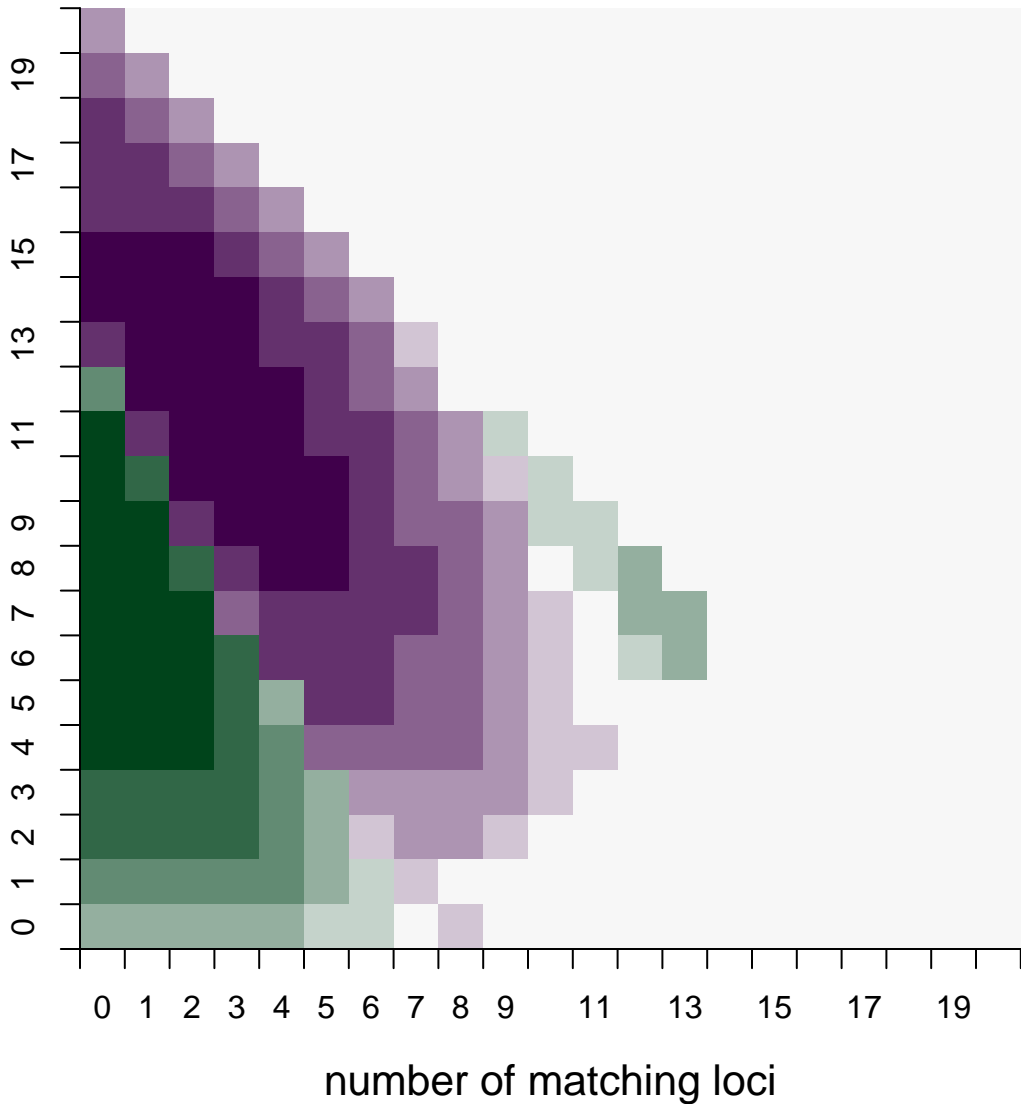

number of partially matching loci

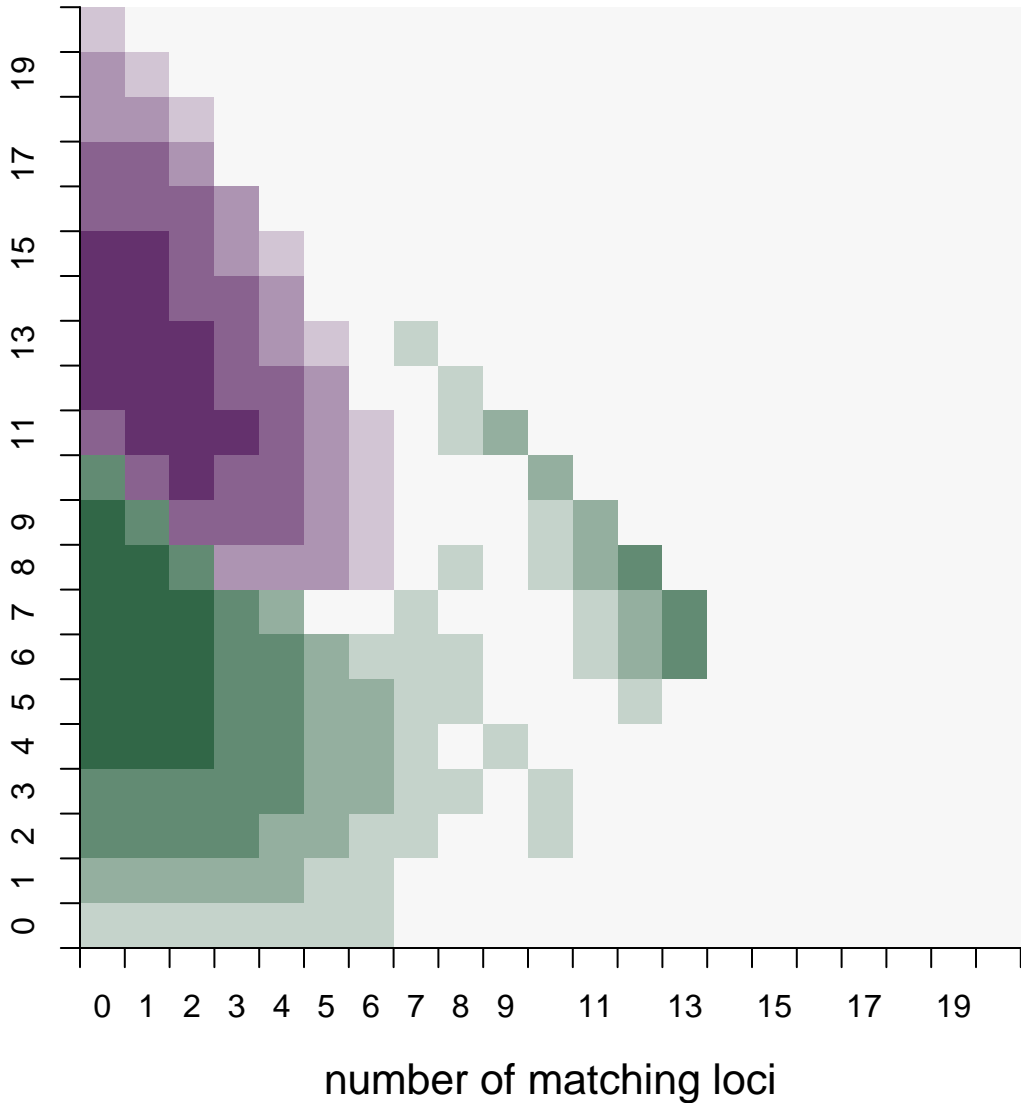

number of partially matching loci

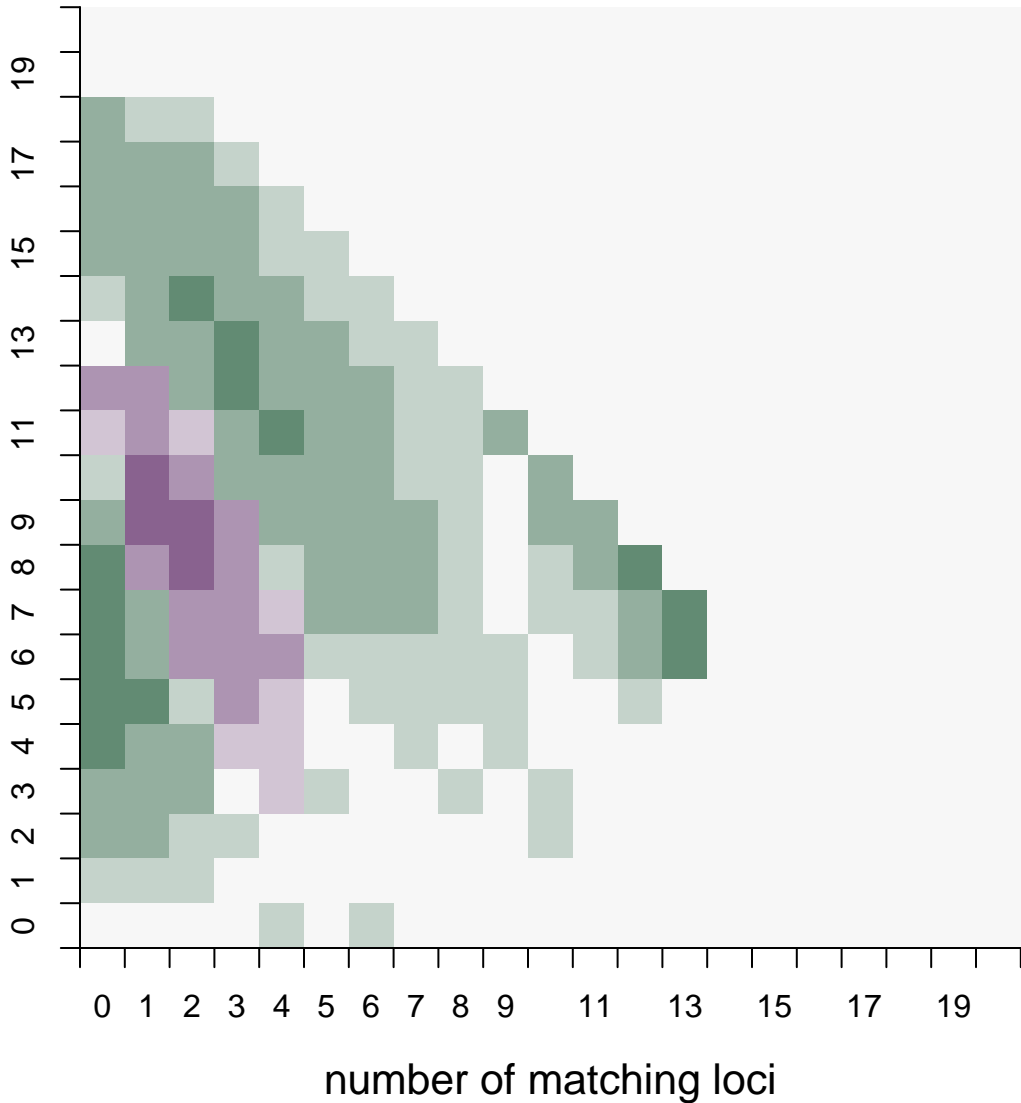

number of partially matching loci

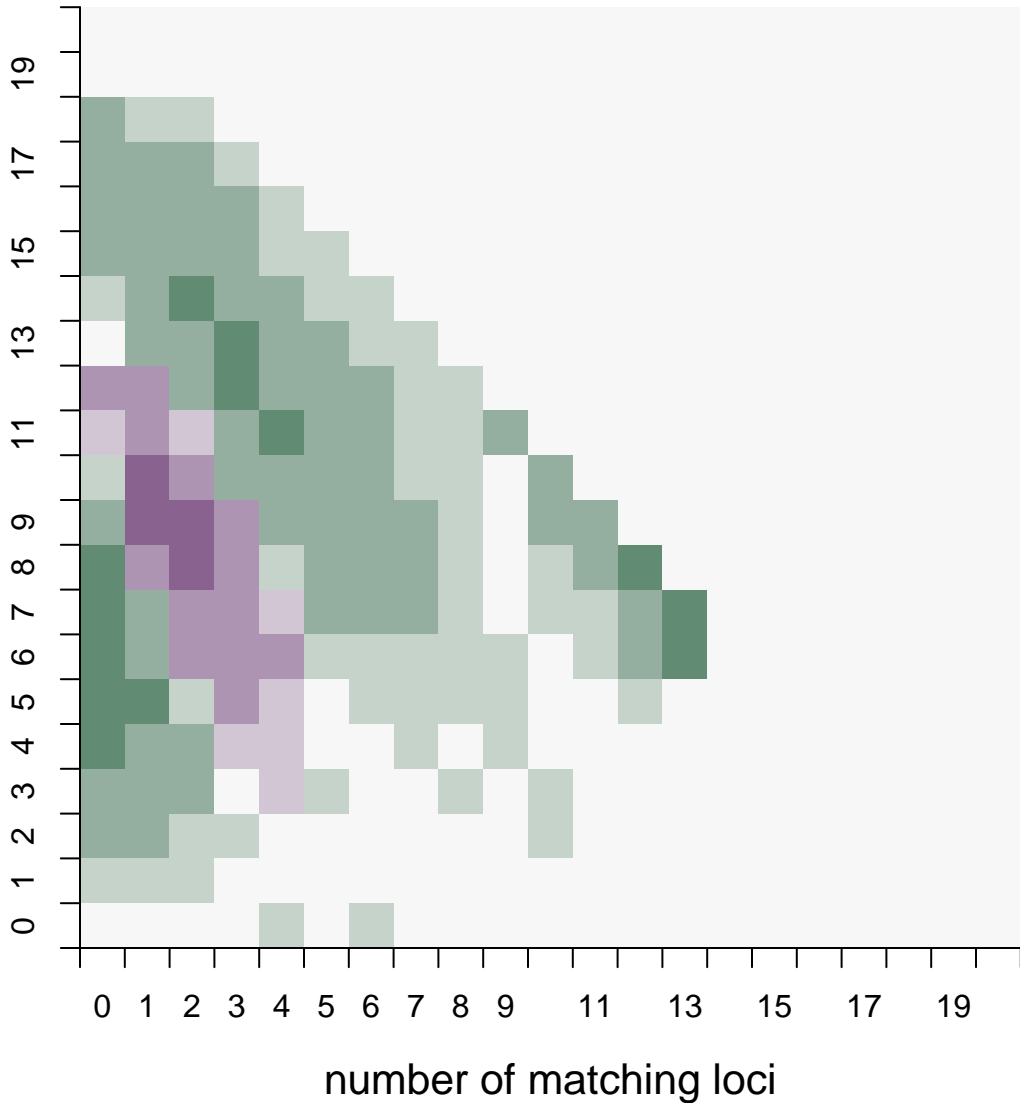

Source: http://biorxiv.org/content/10.1101/009969v1.full.pdf
